# Supplementary material
Source: PubMed Central journal article supplement (PMC3941250)
Supplement: chest_145_3_593_ds01.pdf [file chest_145_3_593_ds01.pdf]

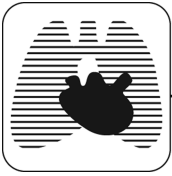

### Automated CT Scan Scores of Bronchiectasis and Air Trapping in Cystic Fibrosis

*Emily M. DeBoer, MD; Waldemar Swiercz, PhD; Sonya L. Heltsh, PhD; Margaret M. Anthony; Paul Szefer, MD; Rebecca Klein, MD; John Strain, MD; Alan S. Brody, MD; and Scott D. Sagel, MD, PhD*

#### RESULTS

Bland Altman plots of interrater reliability are included in e-Figure 4.

**e-Table 1.** Airway counts correlate with lung function and sputum inflammatory markers

|                           | FVC %Pred |               | FEV <sub>1</sub> %Pred |               | FEF <sub>25-75</sub> %Pred |             | Neutrophil Elastase |             | MMP-9 |             |
|---------------------------|-----------|---------------|------------------------|---------------|----------------------------|-------------|---------------------|-------------|-------|-------------|
|                           | r         | 95% CI        | r                      | 95% CI        | r                          | 95% CI      | r                   | 95% CI      | r     | 95% CI      |
| <b>Total Airways</b>      | -0.58     | -0.76, -0.30* | -0.41                  | -0.65, -0.09* | 0.11                       | -0.23, 0.43 | 0.55                | 0.22, 0.77* | -0.05 | -0.38, 0.3  |
| <b>Central Airways</b>    | -0.55     | -0.75, -0.27* | -0.37                  | -0.62, -0.04* | 0.15                       | -0.19, 0.46 | 0.54                | 0.21, 0.76* | -0.03 | -0.37, 0.32 |
| <b>Peripheral Airways</b> | -0.59     | -0.77, -0.32* | -0.47                  | -0.69, -0.16* | 0.01                       | -0.33, 0.34 | 0.51                | 0.16, 0.74* | -0.08 | -0.42, 0.27 |

\* Confidence intervals do not include 0.0, p-value < 0.05

Abbreviations: forced vital capacity (FVC); forced expiratory volume in 1 second (FEV<sub>1</sub>); mid-volume forced expiratory flow (FEF<sub>25-75</sub>); matrix metalloprotease (MMP)

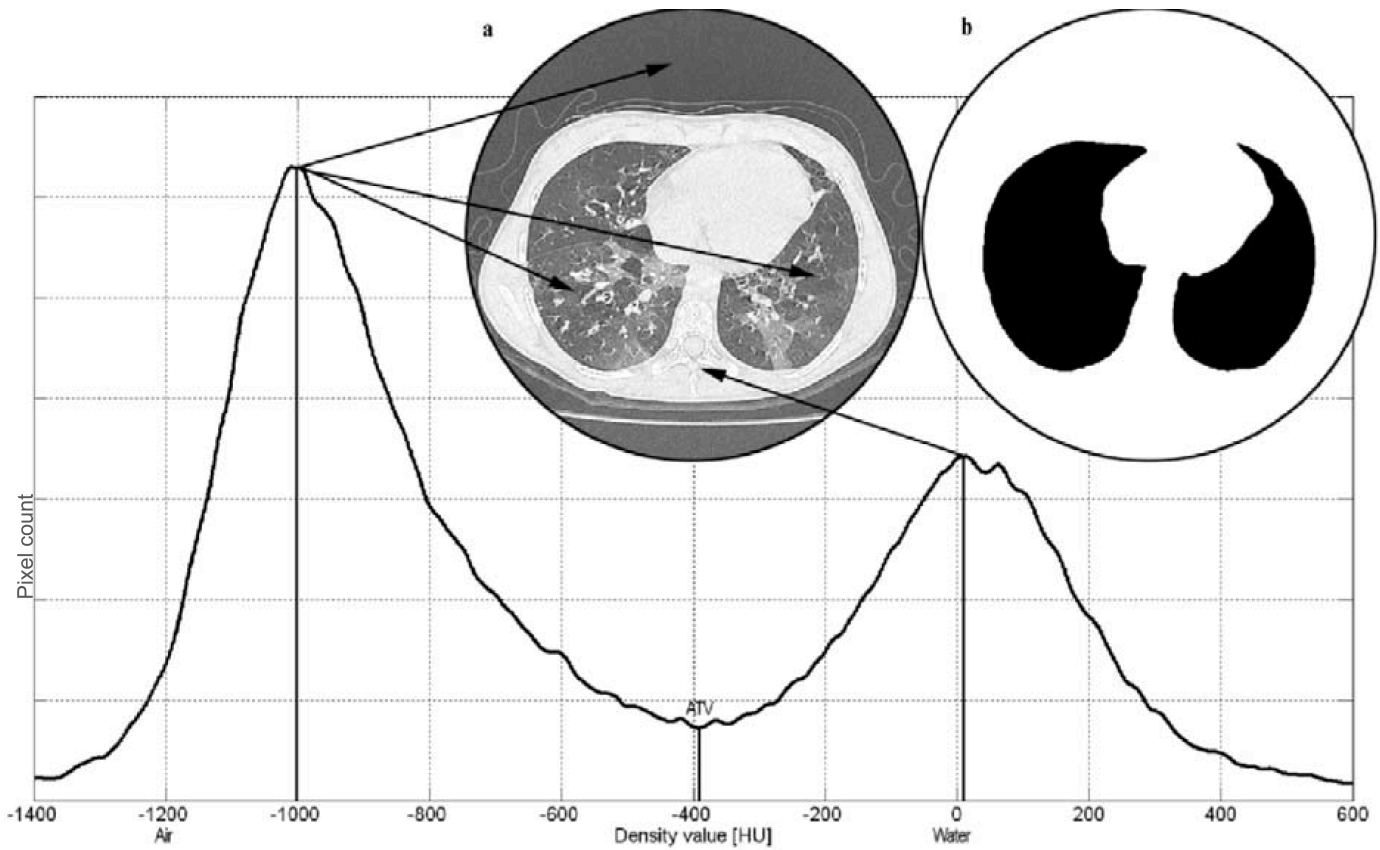

**e-Figure 1.** Histogram of all pixels in an axial CT slice. Peaks are seen at the dense maximum of body tissue and the less dense maximum of air-filled spaces seen in (a). All pixels below the minimum air threshold value (ATV) are used to create the lung segmentation (b).

*Online supplements are not copyedited prior to posting.*

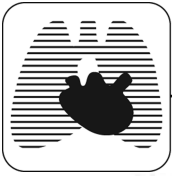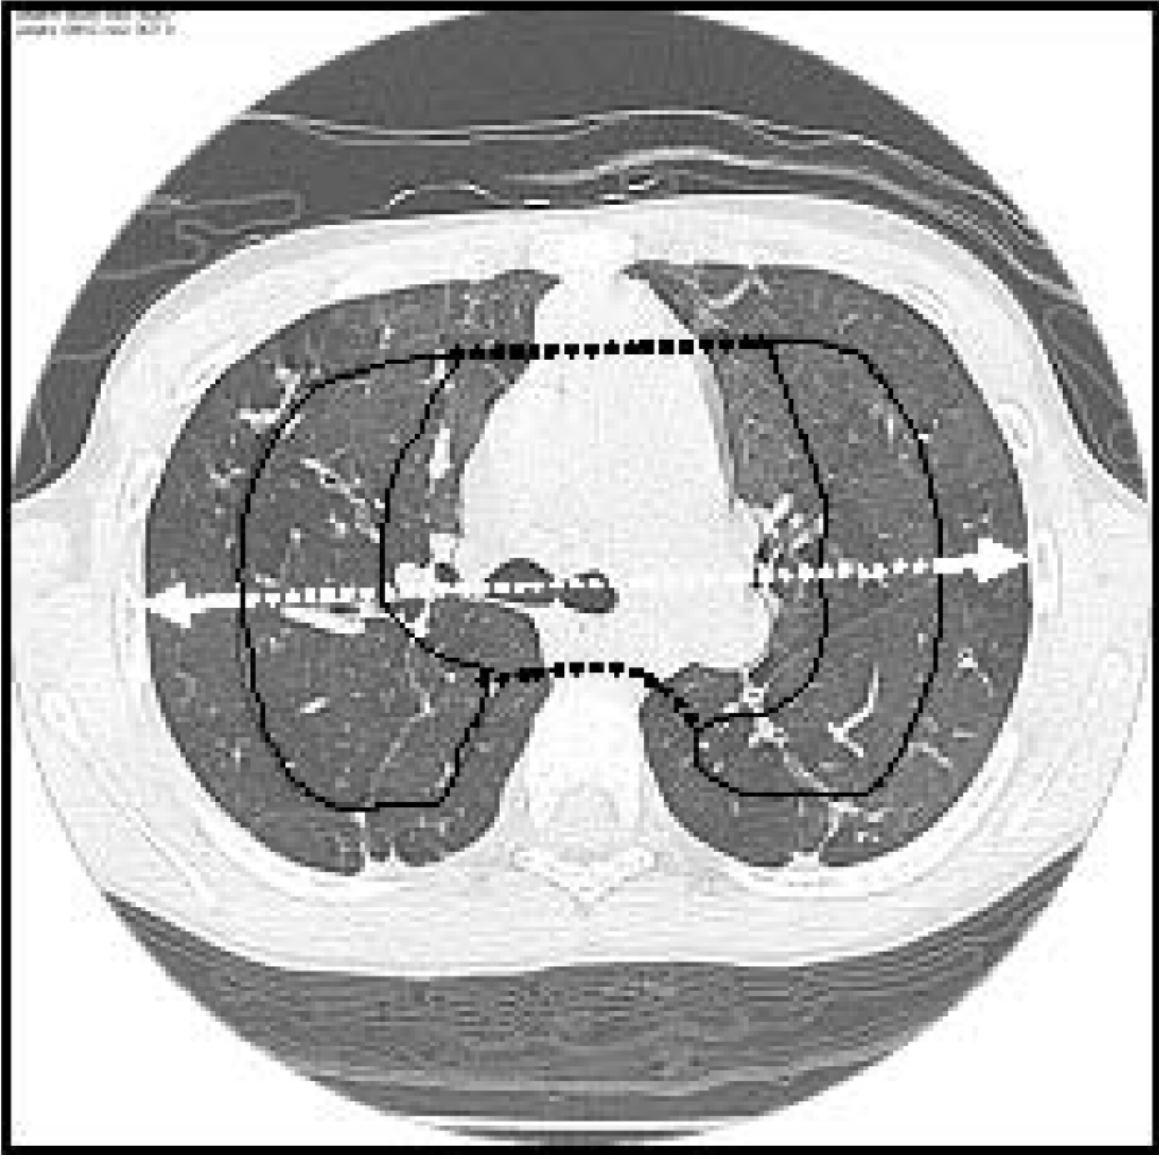

**e-Figure 2.** Inspiratory CT slice with lung separation into central and peripheral regions shown by black solid lines. The white dotted line represents the maximum width of both segmented lungs through the carina. The left and right central regions of center slices are connected as shown by the black dotted line.

*Online supplements are not copyedited prior to posting.*

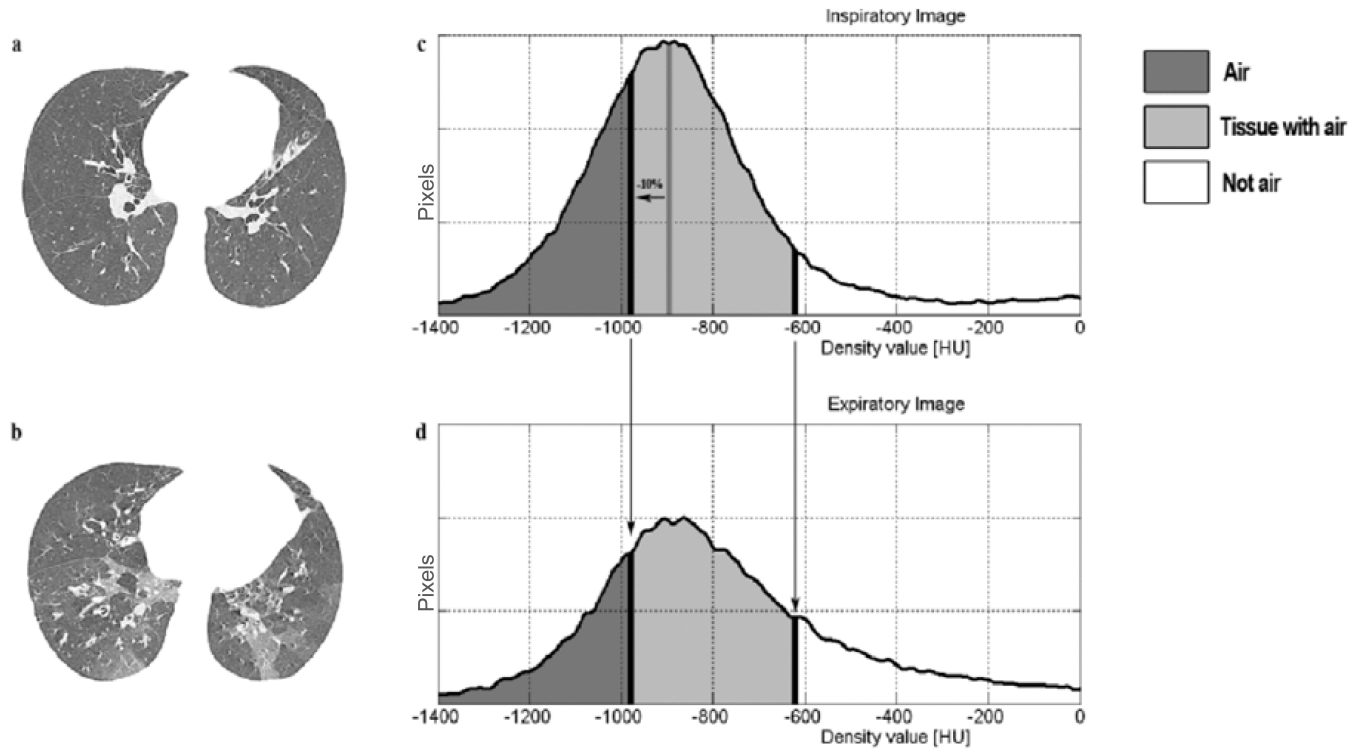

**e-Figure 3.** (a) Inspiratory CT slice. (b) Expiratory CT slice. (c) Inspiratory histogram showing the subject-specific air trapping threshold at 10% below the peak. (d) Expiratory histogram.

*Online supplements are not copyedited prior to posting.*

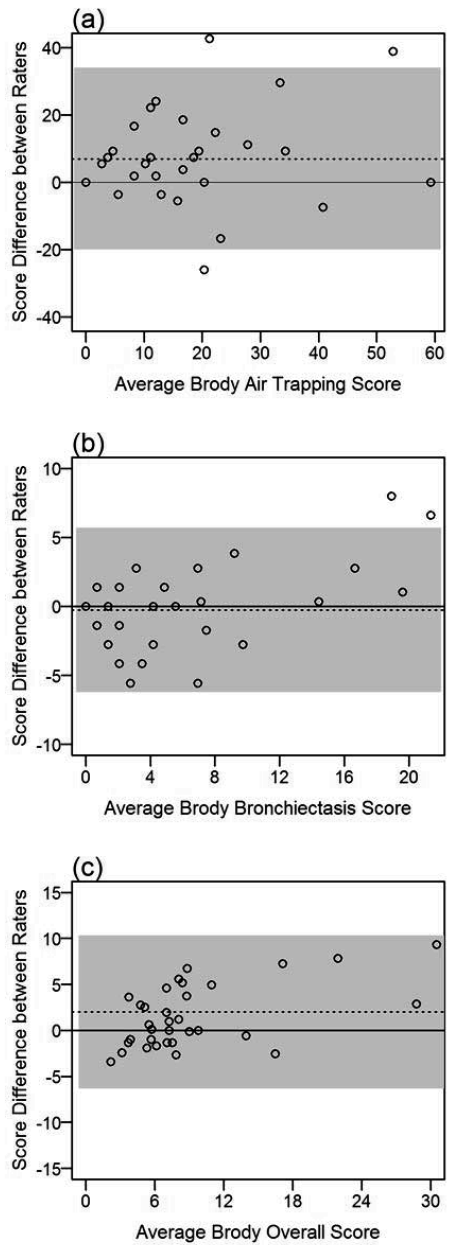

**e-Figure 4.** Bland Altman plots of differences between rater 1 and rater 2 versus average for (a) Brody air trapping, (b) bronchiectasis, and (c) overall scores. Solid line = 0, dashed line= bias, gray region represents 95% limits of agreement.

*Online supplements are not copyedited prior to posting.*
